# Supplementary material for: The Preventive Role of mRNA Vaccines in Reducing Death among Moderate Omicron-Infected Patients: A Follow-Up Study
Source: MDPI journal article supplement (doi:10.3390/v14122622), 2022-11-24

Article

# The Potential Therapeutic Effect of mRNA Vaccine on Better Survival of Moderate Omicron-infected Patients: A Follow-Up Study

## Supplementary Materials

**Table S1.** Estimated regression coefficients with consideration of interaction term of vaccination and the severity of disease with adjustment for age.

| Variable                                                                                                                                                                                                                                                                                                                                                                                                       | Regression coefficient | Standard error | Chi-square | p-value |
|----------------------------------------------------------------------------------------------------------------------------------------------------------------------------------------------------------------------------------------------------------------------------------------------------------------------------------------------------------------------------------------------------------------|------------------------|----------------|------------|---------|
|  <p>Copyright: © 2022 by the authors. Licensee MDPI, Basel, Switzerland. This article is an open access article distributed under the terms and conditions of the Creative Commons Attribution (CC BY) license (<a href="https://creativecommons.org/licenses/by/4.0/">https://creativecommons.org/licenses/by/4.0/</a>).</p> |                        |                |            |         |
| Age                                                                                                                                                                                                                                                                                                                                                                                                            | 0.0109                 | 0.0018         | 38.55      | <0.0001 |
| Severity                                                                                                                                                                                                                                                                                                                                                                                                       |                        |                |            |         |
| Moderate                                                                                                                                                                                                                                                                                                                                                                                                       | (Reference)            |                |            |         |
| Severe                                                                                                                                                                                                                                                                                                                                                                                                         | 2.6021                 | 0.0893         | 848.6      | <0.0001 |
| Vaccination                                                                                                                                                                                                                                                                                                                                                                                                    |                        |                |            |         |
| Unvaccinated                                                                                                                                                                                                                                                                                                                                                                                                   | (Reference)            |                |            |         |
| Vaccinated                                                                                                                                                                                                                                                                                                                                                                                                     | -0.2913                | 0.1156         | 6.35       | 0.0118  |
| Interaction                                                                                                                                                                                                                                                                                                                                                                                                    |                        |                |            |         |
| Severity* Vaccinated                                                                                                                                                                                                                                                                                                                                                                                           | 0.2929                 | 0.1305         | 5.04       | 0.0248  |

**Table S2.** Estimated regression coefficients with consideration of interaction term of vaccination split into primary two-dose and booster group and the severity of disease with adjustment for age.

| <b>Variable</b>                | <b>Regression<br/>coefficient</b> | <b>Standard<br/>error</b> | <b>Chi-square</b> | <b>p-value</b> |
|--------------------------------|-----------------------------------|---------------------------|-------------------|----------------|
| <b>Age</b>                     | 0.0109                            | 0.0018                    | 38.53             | <0.0001        |
| <b>Severity</b>                |                                   |                           |                   |                |
| <b>Moderate</b>                | (Reference)                       |                           |                   |                |
| <b>Severe</b>                  | 2.6086                            | 0.0895                    | 848.7             | <0.0001        |
| <b>Vaccination</b>             |                                   |                           |                   |                |
| <b>Unvaccinated</b>            | (Reference)                       |                           |                   |                |
| <b>Primary 2-dose group</b>    | -0.1401                           | 0.1694                    | 0.68              | 0.4081         |
| <b>Booster group</b>           | -0.3467                           | 0.1295                    | 7.16              | 0.0074         |
| <b>Interaction</b>             |                                   |                           |                   |                |
| <b>Severity*primary 2-dose</b> | 0.0400                            | 0.1913                    | 0.0436            | 0.8345         |
| <b>Severity*Booster</b>        | 0.3989                            | 0.1461                    | 7.4521            | 0.0063         |

**Figure S1.** Survival curve of hospitalized patients of primary 2-dose, booster vaccine and unvaccinated group.

**(A) Moderate patients**

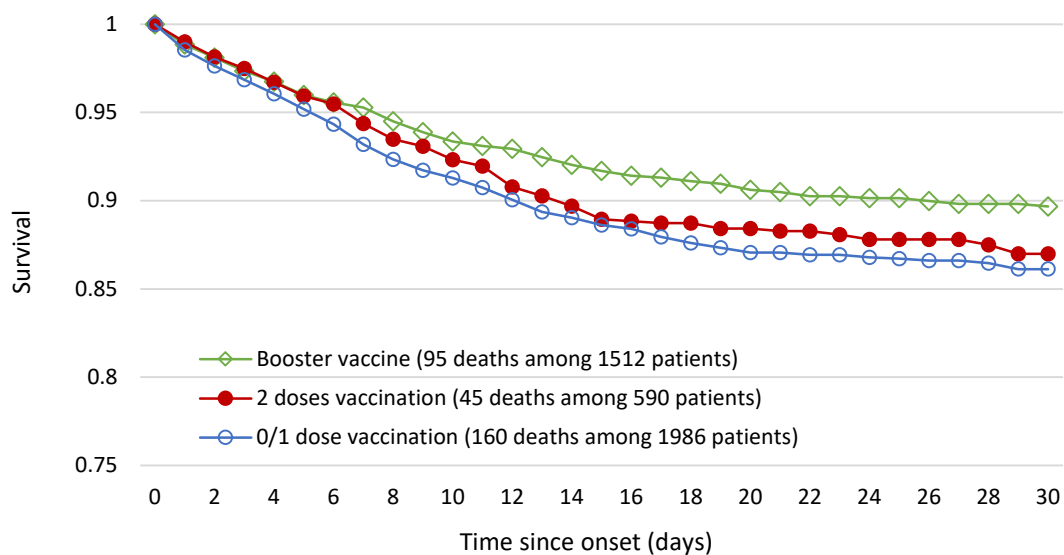

**(B) Severe patients**

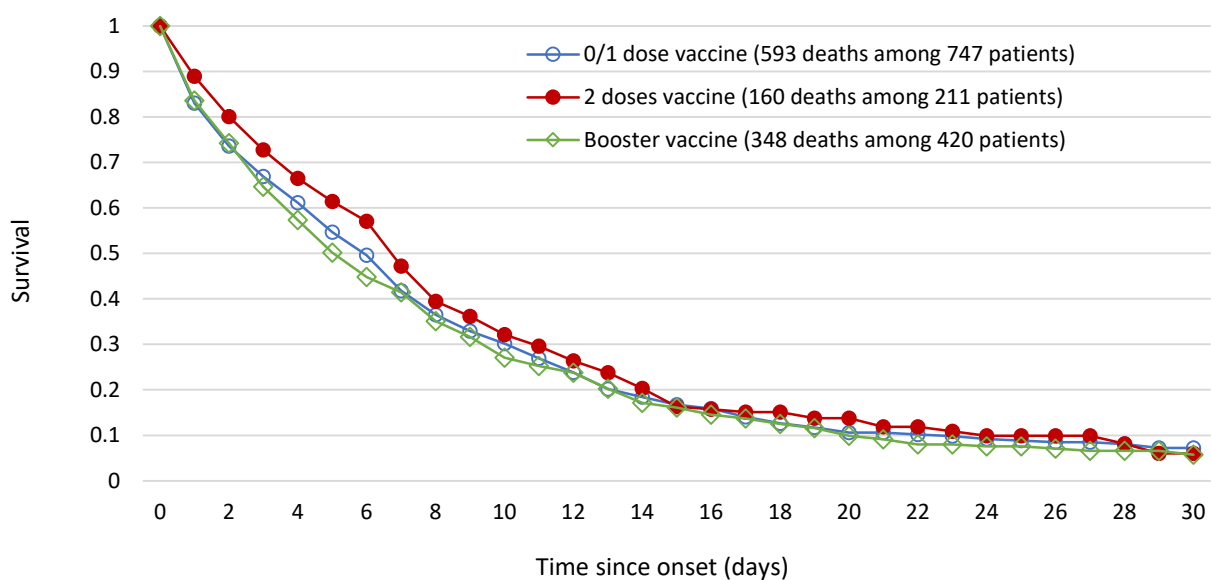

Supplement: s1 [file s1]
